Articles of interest in other COB journals

From *Journal of Cell Science*

**Asymmetric localization of the adaptor protein Miranda in neuroblasts is achieved by diffusion and sequential interaction of Myosin II and VI**

Veronika Erben, Markus Waldhuber, Diana Langer, Ingrid Fetka, Ralf Peter Jansen and Claudia Petritsch

Erben, V. et al. 2008. *J. Cell Sci.* doi: 10.1242/jcs.020024

**Inhibition of  $\beta$ -catenin signaling causes defects in postnatal cartilage development**

Mo Chen, Mei Zhu, Hani Awad, Tian-Fang Li, Tzong-Jen Sheu, Brendan F. Boyce, Di Chen and Regis J. O'Keefe

Chen, M. et al. 2008. *J. Cell Sci.* doi: 10.1242/jcs.020362
